# Supplementary material for: Cancer Survivors in Saint Lucia Deeply Value Social Support: Considerations for Cancer Control in Under-Resourced Communities
Source: MDPI journal article supplement (doi:10.3390/ijerph19116531), 2022-05-27
Supplement: s1 [file s1]

**Title:** Cancer survivors in Saint Lucia deeply value social support: considerations for cancer control in under-resourced communities

Aviane Auguste, Shania Cox, JoAnn S Oliver, Dorothy Phillip, Owen Gabriel, James St.Catherine, Carlene Radix, Danièle Luce and Christine Barul

## Supplementary materials

**Table S1:** Characteristics of cancer patients who were represented by a caregiver during the study interview.

| Variable                        | Patient n°    |               |                    |
|---------------------------------|---------------|---------------|--------------------|
|                                 | 17            | 18            | 19                 |
| Sex                             | Female        | Female        | Male               |
| Age at diagnosis (y)            | 69            | 55            | 60                 |
| Cancer site                     | Endometrium   | Breast        | Colon              |
| Survivorship (y)                | <1            | <1            | <1                 |
| Stage at diagnosis              | Missing       | IV            | IV                 |
| Vital status at interview       | Alive         | Dead          | Alive              |
| Treatment status                | No treatment  | No treatment  | Still on-treatment |
| Marital status                  | Married/Other | Married/Other | Single             |
| Education level                 | Primary       | Secondary     | Primary            |
| Private medical insurance       | No            | No            | No                 |
| Hot water at home               | No            | No            | No                 |
| History of medical condition(s) | No            | No            | Yes                |
| Professional status             | Not working   | Not working   | Missing            |
| Treatment abroad                | NA            | NA            | No                 |
| Diagnostic test(s) abroad       | Missing       | Yes           | No                 |

NA: Not applicable

**Table S2:** Caregiver responses for the three open-ended questions from the interview.

| Open-ended question                                                                                   | Caregiver n° | Quotes                                                                                                                                                                                                              |
|-------------------------------------------------------------------------------------------------------|--------------|---------------------------------------------------------------------------------------------------------------------------------------------------------------------------------------------------------------------|
| Was there anything in particular that made your experience easier?                                    | 17           | NA                                                                                                                                                                                                                  |
|                                                                                                       | 18           | <i>She (the patient) has a family member who is able to send her for a different opinion on her illness</i>                                                                                                         |
|                                                                                                       | 19           | NA                                                                                                                                                                                                                  |
| Was there anything in particular that made your experience harder?                                    | 17           | <i>Doctors might have realised it was cancer and never told me. Doctors need to be professional at all times regardless of how difficult it is for persons who give care or patients themselves</i>                 |
|                                                                                                       | 18           | <i>Family not knowing she (the patient) is sick</i>                                                                                                                                                                 |
|                                                                                                       | 19           | <i>There were many hitches in the care of my brother during his illness but the one which stands out to me is the delay in the follow up with the oncologist because of the change of oncologist.</i>               |
| Do you have any suggestions to help improve the experience for other people in similar circumstances? | 17           | <i>Seek help from persons with similar illnesses. Go to your health care provider if unexplained changes occur in your body. Do not keep your diagnosis to yourself as it might be more difficult to deal with.</i> |
|                                                                                                       | 18           | <i>Tell loved one how you feel. Do not be ashamed to discuss/disclose body changes with loved ones. Do your annual check-up.</i>                                                                                    |
|                                                                                                       | 19           | <i>I believe that there should be more than one specialist available in the event that one is absent. Patients will not be left stranded and eventually die</i>                                                     |

NA: No response provided for this question
